# Supplementary material
Source: publisher figshare collection journal article supplement (https://acs.figshare.com/ndownloader/files/4763131)
Supplement: Supplementary file 1 [file 4763131]

 
data_rjw74 
 
_audit_creation_method            SHELXL-97 
_chemical_name_systematic 
; 
 ? 
; 
_chemical_name_common             J*N(TMS)Ga 
_chemical_melting_point           183 
_chemical_formula_moiety          'C27 H34 Ga N Si' 
_chemical_formula_sum 
 'C27 H34 Ga N Si' 
_chemical_formula_weight          470.36 
 
loop_ 
 _atom_type_symbol 
 _atom_type_description 
 _atom_type_scat_dispersion_real 
 _atom_type_scat_dispersion_imag 
 _atom_type_scat_source 
 'C'  'C'   0.0033   0.0016 
 'International Tables Vol C Tables 4.2.6.8 and 6.1.1.4' 
 'H'  'H'   0.0000   0.0000 
 'International Tables Vol C Tables 4.2.6.8 and 6.1.1.4' 
 'N'  'N'   0.0061   0.0033 
 'International Tables Vol C Tables 4.2.6.8 and 6.1.1.4' 
 'Si'  'Si'   0.0817   0.0704 
 'International Tables Vol C Tables 4.2.6.8 and 6.1.1.4' 
 'Ga'  'Ga'   0.2307   1.6083 
 'International Tables Vol C Tables 4.2.6.8 and 6.1.1.4' 
 
_symmetry_cell_setting            triclinic
_symmetry_space_group_name_H-M    P-1 
_symmetry_space_group_name_Hall   '-P 1'  

loop_ 
 _symmetry_equiv_pos_as_xyz 
 'x, y, z' 
 '-x, -y, -z' 
 
_cell_length_a                    11.0720(7) 
_cell_length_b                    11.6811(8) 
_cell_length_c                    11.9741(8) 
_cell_angle_alpha                 118.6700(10) 
_cell_angle_beta                  114.1440(10) 
_cell_angle_gamma                 90.1510(10) 
_cell_volume                      1201.05(14) 
_cell_formula_units_Z             2 
_cell_measurement_temperature     90(2) 
_cell_measurement_reflns_used     4673 
_cell_measurement_theta_min       3.71 
_cell_measurement_theta_max       27.24 
 
_exptl_crystal_description        block 
_exptl_crystal_colour             'pale yellow' 
_exptl_crystal_size_max           0.38 
_exptl_crystal_size_mid           0.22 
_exptl_crystal_size_min           0.19 
_exptl_crystal_density_meas       ? 
_exptl_crystal_density_diffrn     1.301 
_exptl_crystal_density_method     'not measured' 
_exptl_crystal_F_000              496 
_exptl_absorpt_coefficient_mu     1.209 
_exptl_absorpt_correction_type    empirical 
_exptl_absorpt_correction_T_min   0.6578
_exptl_absorpt_correction_T_max   0.8001
_exptl_absorpt_process_details    'SADABS 2.10 (Sheldrick, 2003) ' 
 
_exptl_special_details 
; 
 ? 
; 
 
_diffrn_ambient_temperature       90(2) 
_diffrn_radiation_wavelength      0.71073 
_diffrn_radiation_type            MoK\a 
_diffrn_radiation_source          'fine-focus sealed tube' 
_diffrn_radiation_monochromator   graphite 
_diffrn_measurement_device_type   'Bruker SMART 1000'
_diffrn_measurement_method        '\w and \f' 
_diffrn_detector_area_resol_mean  8.3 
_diffrn_standards_number          '50 frames remeasured' 
_diffrn_standards_interval_count  ? 
_diffrn_standards_interval_time   ? 
_diffrn_standards_decay_%         ? 
_diffrn_reflns_number             8541 
_diffrn_reflns_av_R_equivalents   0.0184 
_diffrn_reflns_av_sigmaI/netI     0.0338 
_diffrn_reflns_limit_h_min        -14 
_diffrn_reflns_limit_h_max        14 
_diffrn_reflns_limit_k_min        -14 
_diffrn_reflns_limit_k_max        14 
_diffrn_reflns_limit_l_min        -15 
_diffrn_reflns_limit_l_max        15 
_diffrn_reflns_theta_min          3.66 
_diffrn_reflns_theta_max          27.49 
_reflns_number_total              4938 
_reflns_number_gt                 4124 
_reflns_threshold_expression      >2sigma(I) 
 
_computing_data_collection        'Bruker SMART'
_computing_cell_refinement        'SAINT (7.06a) (Bruker, 2004)' 
_computing_data_reduction         'SAINT (7.06a) (Bruker, 2004)' 
_computing_structure_solution     'SHELXS-97 (Sheldrick, 1990)' 
_computing_structure_refinement   'SHELXL-97 (Sheldrick, 1997)' 
_computing_molecular_graphics     'SHELXTL 5.1, XP (Sheldrick, 1994)' 
_computing_publication_material   'SHELXL97' 
 
_refine_special_details 
; 
 Refinement of F^2^ against ALL reflections.  The weighted R-factor wR and 
 goodness of fit S are based on F^2^, conventional R-factors R are based 
 on F, with F set to zero for negative F^2^. The threshold expression of 
 F^2^ > 2sigma(F^2^) is used only for calculating R-factors(gt) etc. and is 
 not relevant to the choice of reflections for refinement.  R-factors based 
 on F^2^ are statistically about twice as large as those based on F, and R- 
 factors based on ALL data will be even larger. 
; 
 
_refine_ls_structure_factor_coef  Fsqd  
_refine_ls_matrix_type            full 
_refine_ls_weighting_scheme       calc  
_refine_ls_weighting_details 
 'calc w=1/[\s^2^(Fo^2^)+(0.0534P)^2^+1.2898P] where P=(Fo^2^+2Fc^2^)/3' 
_atom_sites_solution_primary      direct 
_atom_sites_solution_secondary    difmap 
_atom_sites_solution_hydrogens    geom 
_refine_ls_hydrogen_treatment     constr
_refine_ls_extinction_method      none 
_refine_ls_extinction_coef        ? 
_refine_ls_number_reflns          4243 
_refine_ls_number_parameters      280 
_refine_ls_number_restraints      0 
_refine_ls_R_factor_all           0.0449 
_refine_ls_R_factor_gt            0.0360 
_refine_ls_wR_factor_ref          0.1079 
_refine_ls_wR_factor_gt           0.1028 
_refine_ls_goodness_of_fit_ref    1.142 
_refine_ls_restrained_S_all       1.142 
_refine_ls_shift/su_max           0.001 
_refine_ls_shift/su_mean          0.000 
 
loop_ 
 _atom_site_label 
 _atom_site_type_symbol 
 _atom_site_fract_x 
 _atom_site_fract_y 
 _atom_site_fract_z 
 _atom_site_U_iso_or_equiv 
 _atom_site_adp_type 
 _atom_site_occupancy 
 _atom_site_symmetry_multiplicity 
 _atom_site_calc_flag 
 _atom_site_refinement_flags 
 _atom_site_disorder_assembly 
 _atom_site_disorder_group 
Ga1 Ga 0.86589(3) 0.92125(3) 0.35479(4) 0.02031(13) Uani 1 1 d . . . 
Si1 Si 0.89917(7) 0.66289(7) 0.36225(8) 0.01215(18) Uani 1 1 d . . . 
N1 N 0.7903(2) 0.7700(2) 0.3585(2) 0.0113(5) Uani 1 1 d . . . 
C1 C 0.6537(3) 0.7462(3) 0.3317(3) 0.0105(5) Uani 1 1 d . . . 
C2 C 0.5542(3) 0.7741(3) 0.2329(3) 0.0113(5) Uani 1 1 d . . . 
C3 C 0.4169(3) 0.7467(3) 0.1984(3) 0.0141(6) Uani 1 1 d . . . 
H3 H 0.3523 0.7650 0.1310 0.017 Uiso 1 1 calc R . . 
C4 C 0.3727(3) 0.6934(3) 0.2605(3) 0.0146(6) Uani 1 1 d . . . 
H4 H 0.2784 0.6710 0.2332 0.018 Uiso 1 1 calc R . . 
C5 C 0.4698(3) 0.6738(3) 0.3635(3) 0.0131(6) Uani 1 1 d . . . 
H5 H 0.4408 0.6398 0.4088 0.016 Uiso 1 1 calc R . . 
C6 C 0.6094(3) 0.7023(3) 0.4034(3) 0.0113(5) Uani 1 1 d . . . 
C7 C 0.5968(3) 0.8455(3) 0.1745(3) 0.0112(5) Uani 1 1 d . . . 
C8 C 0.6083(3) 0.9853(3) 0.2379(3) 0.0134(6) Uani 1 1 d . . . 
C9 C 0.6479(3) 1.0523(3) 0.1834(3) 0.0157(6) Uani 1 1 d . . . 
H9 H 0.6542 1.1462 0.2253 0.019 Uiso 1 1 calc R . . 
C10 C 0.6783(3) 0.9862(3) 0.0704(3) 0.0149(6) Uani 1 1 d . . . 
C11 C 0.6653(3) 0.8475(3) 0.0077(3) 0.0143(6) Uani 1 1 d . . . 
H11 H 0.6851 0.8006 -0.0706 0.017 Uiso 1 1 calc R . . 
C12 C 0.6241(3) 0.7758(3) 0.0570(3) 0.0116(5) Uani 1 1 d . . . 
C13 C 0.5801(3) 1.0652(3) 0.3639(3) 0.0210(6) Uani 1 1 d . . . 
H13A H 0.6338 1.1587 0.4213 0.031 Uiso 1 1 calc R . . 
H13B H 0.6056 1.0258 0.4239 0.031 Uiso 1 1 calc R . . 
H13C H 0.4826 1.0631 0.3283 0.031 Uiso 1 1 calc R . . 
C14 C 0.7257(3) 1.0639(3) 0.0190(3) 0.0209(6) Uani 1 1 d . . . 
H14A H 0.8225 1.1106 0.0845 0.031 Uiso 1 1 calc R . . 
H14B H 0.6718 1.1301 0.0174 0.031 Uiso 1 1 calc R . . 
H14C H 0.7135 1.0016 -0.0782 0.031 Uiso 1 1 calc R . . 
C15 C 0.6120(3) 0.6265(3) -0.0130(3) 0.0168(6) Uani 1 1 d . . . 
H15A H 0.6651 0.6061 0.0608 0.025 Uiso 1 1 calc R . . 
H15B H 0.6472 0.5976 -0.0827 0.025 Uiso 1 1 calc R . . 
H15C H 0.5158 0.5785 -0.0626 0.025 Uiso 1 1 calc R . . 
C16 C 0.7043(3) 0.6966(3) 0.5317(3) 0.0115(5) Uani 1 1 d . . . 
C17 C 0.6985(3) 0.5755(3) 0.5309(3) 0.0123(5) Uani 1 1 d . . . 
C18 C 0.7795(3) 0.5775(3) 0.6573(3) 0.0148(6) Uani 1 1 d . . . 
H18 H 0.7763 0.4952 0.6553 0.018 Uiso 1 1 calc R . . 
C19 C 0.8645(3) 0.6956(3) 0.7858(3) 0.0161(6) Uani 1 1 d . . . 
C20 C 0.8674(3) 0.8144(3) 0.7851(3) 0.0158(6) Uani 1 1 d . . . 
H20 H 0.9247 0.8963 0.8721 0.019 Uiso 1 1 calc R . . 
C21 C 0.7898(3) 0.8177(3) 0.6621(3) 0.0132(6) Uani 1 1 d . . . 
C22 C 0.6046(3) 0.4426(3) 0.3981(3) 0.0147(6) Uani 1 1 d . . . 
H22A H 0.6503 0.3700 0.3939 0.022 Uiso 1 1 calc R . . 
H22B H 0.5823 0.4463 0.3120 0.022 Uiso 1 1 calc R . . 
H22C H 0.5204 0.4255 0.4025 0.022 Uiso 1 1 calc R . . 
C23 C 0.9486(3) 0.6960(3) 0.9222(3) 0.0220(7) Uani 1 1 d . . . 
H23A H 1.0457 0.7155 0.9482 0.033 Uiso 1 1 calc R . . 
H23B H 0.9213 0.6075 0.9065 0.033 Uiso 1 1 calc R . . 
H23C H 0.9334 0.7652 1.0003 0.033 Uiso 1 1 calc R . . 
C24 C 0.7985(3) 0.9521(3) 0.6724(3) 0.0182(6) Uani 1 1 d . . . 
H24A H 0.8312 1.0249 0.7727 0.027 Uiso 1 1 calc R . . 
H24B H 0.7078 0.9553 0.6126 0.027 Uiso 1 1 calc R . . 
H24C H 0.8620 0.9630 0.6384 0.027 Uiso 1 1 calc R . . 
C25 C 1.0162(3) 0.6894(3) 0.5419(3) 0.0170(6) Uani 1 1 d . . . 
H25A H 1.0594 0.7857 0.6115 0.026 Uiso 1 1 calc R . . 
H25B H 1.0869 0.6402 0.5344 0.026 Uiso 1 1 calc R . . 
H25C H 0.9639 0.6562 0.5742 0.026 Uiso 1 1 calc R . . 
C26 C 1.0147(3) 0.6983(3) 0.2963(3) 0.0212(6) Uani 1 1 d . . . 
H26A H 0.9591 0.6839 0.2004 0.032 Uiso 1 1 calc R . . 
H26B H 1.0758 0.6375 0.2911 0.032 Uiso 1 1 calc R . . 
H26C H 1.0691 0.7919 0.3631 0.032 Uiso 1 1 calc R . . 
C27 C 0.8061(3) 0.4809(3) 0.2344(3) 0.0176(6) Uani 1 1 d . . . 
H27A H 0.7349 0.4611 0.2557 0.026 Uiso 1 1 calc R . . 
H27B H 0.8706 0.4250 0.2450 0.026 Uiso 1 1 calc R . . 
H27C H 0.7641 0.4612 0.1354 0.026 Uiso 1 1 calc R . . 
 
loop_ 
 _atom_site_aniso_label 
 _atom_site_aniso_U_11 
 _atom_site_aniso_U_22 
 _atom_site_aniso_U_33 
 _atom_site_aniso_U_23 
 _atom_site_aniso_U_13 
 _atom_site_aniso_U_12 
Ga1 0.01574(19) 0.0197(2) 0.0260(2) 0.01483(16) 0.00680(15) 0.00178(14) 
Si1 0.0107(4) 0.0136(4) 0.0146(4) 0.0088(3) 0.0063(3) 0.0040(3) 
N1 0.0104(11) 0.0113(11) 0.0125(12) 0.0072(10) 0.0046(9) 0.0013(9) 
C1 0.0111(13) 0.0055(12) 0.0112(14) 0.0023(11) 0.0046(11) 0.0009(10) 
C2 0.0134(13) 0.0076(12) 0.0119(14) 0.0038(11) 0.0068(11) 0.0029(10) 
C3 0.0120(13) 0.0142(14) 0.0139(14) 0.0075(12) 0.0040(11) 0.0030(11) 
C4 0.0097(13) 0.0133(13) 0.0178(15) 0.0062(12) 0.0063(11) 0.0013(11) 
C5 0.0150(13) 0.0104(13) 0.0141(14) 0.0053(11) 0.0085(11) 0.0009(11) 
C6 0.0134(13) 0.0076(12) 0.0097(13) 0.0029(11) 0.0048(11) 0.0018(10) 
C7 0.0060(12) 0.0137(13) 0.0117(14) 0.0073(12) 0.0015(10) 0.0013(10) 
C8 0.0112(13) 0.0132(14) 0.0130(14) 0.0060(12) 0.0044(11) 0.0029(11) 
C9 0.0137(13) 0.0119(13) 0.0179(15) 0.0076(12) 0.0048(11) 0.0029(11) 
C10 0.0091(13) 0.0189(14) 0.0171(15) 0.0118(13) 0.0035(11) 0.0030(11) 
C11 0.0102(13) 0.0184(14) 0.0139(14) 0.0091(12) 0.0047(11) 0.0042(11) 
C12 0.0074(12) 0.0129(13) 0.0099(13) 0.0058(11) 0.0004(10) 0.0022(10) 
C13 0.0271(16) 0.0166(15) 0.0220(16) 0.0093(13) 0.0150(14) 0.0074(13) 
C14 0.0195(15) 0.0237(16) 0.0259(17) 0.0179(14) 0.0101(13) 0.0039(13) 
C15 0.0206(15) 0.0137(14) 0.0136(14) 0.0061(12) 0.0072(12) 0.0034(12) 
C16 0.0112(13) 0.0130(13) 0.0119(14) 0.0063(12) 0.0071(11) 0.0029(11) 
C17 0.0115(13) 0.0147(14) 0.0126(14) 0.0069(12) 0.0075(11) 0.0029(11) 
C18 0.0155(14) 0.0172(14) 0.0202(15) 0.0131(13) 0.0116(12) 0.0064(11) 
C19 0.0130(13) 0.0246(16) 0.0137(15) 0.0109(13) 0.0077(12) 0.0052(12) 
C20 0.0133(13) 0.0160(14) 0.0109(14) 0.0024(12) 0.0054(11) -0.0005(11) 
C21 0.0125(13) 0.0140(14) 0.0139(14) 0.0061(12) 0.0083(11) 0.0028(11) 
C22 0.0183(14) 0.0105(13) 0.0159(15) 0.0071(12) 0.0083(12) 0.0014(11) 
C23 0.0199(15) 0.0306(17) 0.0151(15) 0.0131(14) 0.0065(13) 0.0063(13) 
C24 0.0216(15) 0.0131(14) 0.0154(15) 0.0052(12) 0.0075(12) 0.0007(12) 
C25 0.0129(13) 0.0186(15) 0.0195(15) 0.0112(13) 0.0062(12) 0.0046(12) 
C26 0.0205(15) 0.0276(17) 0.0274(17) 0.0186(15) 0.0163(14) 0.0115(13) 
C27 0.0196(14) 0.0155(14) 0.0170(15) 0.0076(13) 0.0092(12) 0.0054(12) 
 
_geom_special_details 
; 
 All esds (except the esd in the dihedral angle between two l.s. planes) 
 are estimated using the full covariance matrix.  The cell esds are taken 
 into account individually in the estimation of esds in distances, angles 
 and torsion angles; correlations between esds in cell parameters are only 
 used when they are defined by crystal symmetry.  An approximate (isotropic) 
 treatment of cell esds is used for estimating esds involving l.s. planes. 
; 
 
loop_ 
 _geom_bond_atom_site_label_1 
 _geom_bond_atom_site_label_2 
 _geom_bond_distance 
 _geom_bond_site_symmetry_2 
 _geom_bond_publ_flag 
Ga1 N1 1.980(2) . ? 
Si1 N1 1.743(2) . ? 
Si1 C25 1.866(3) . ? 
Si1 C27 1.871(3) . ? 
Si1 C26 1.889(3) . ? 
N1 C1 1.408(3) . ? 
C1 C6 1.416(4) . ? 
C1 C2 1.423(4) . ? 
C2 C3 1.393(4) . ? 
C2 C7 1.494(4) . ? 
C3 C4 1.386(4) . ? 
C3 H3 0.9500 . ? 
C4 C5 1.385(4) . ? 
C4 H4 0.9500 . ? 
C5 C6 1.403(4) . ? 
C5 H5 0.9500 . ? 
C6 C16 1.500(4) . ? 
C7 C12 1.408(4) . ? 
C7 C8 1.410(4) . ? 
C8 C9 1.398(4) . ? 
C8 C13 1.510(4) . ? 
C9 C10 1.383(4) . ? 
C9 H9 0.9500 . ? 
C10 C11 1.397(4) . ? 
C10 C14 1.508(4) . ? 
C11 C12 1.397(4) . ? 
C11 H11 0.9500 . ? 
C12 C15 1.506(4) . ? 
C13 H13A 0.9800 . ? 
C13 H13B 0.9800 . ? 
C13 H13C 0.9800 . ? 
C14 H14A 0.9800 . ? 
C14 H14B 0.9800 . ? 
C14 H14C 0.9800 . ? 
C15 H15A 0.9800 . ? 
C15 H15B 0.9800 . ? 
C15 H15C 0.9800 . ? 
C16 C17 1.411(4) . ? 
C16 C21 1.414(4) . ? 
C17 C18 1.397(4) . ? 
C17 C22 1.513(4) . ? 
C18 C19 1.388(4) . ? 
C18 H18 0.9500 . ? 
C19 C20 1.392(4) . ? 
C19 C23 1.511(4) . ? 
C20 C21 1.388(4) . ? 
C20 H20 0.9500 . ? 
C21 C24 1.514(4) . ? 
C22 H22A 0.9800 . ? 
C22 H22B 0.9800 . ? 
C22 H22C 0.9800 . ? 
C23 H23A 0.9800 . ? 
C23 H23B 0.9800 . ? 
C23 H23C 0.9800 . ? 
C24 H24A 0.9800 . ? 
C24 H24B 0.9800 . ? 
C24 H24C 0.9800 . ? 
C25 H25A 0.9800 . ? 
C25 H25B 0.9800 . ? 
C25 H25C 0.9800 . ? 
C26 H26A 0.9800 . ? 
C26 H26B 0.9800 . ? 
C26 H26C 0.9800 . ? 
C27 H27A 0.9800 . ? 
C27 H27B 0.9800 . ? 
C27 H27C 0.9800 . ? 
 
loop_ 
 _geom_angle_atom_site_label_1 
 _geom_angle_atom_site_label_2 
 _geom_angle_atom_site_label_3 
 _geom_angle 
 _geom_angle_site_symmetry_1 
 _geom_angle_site_symmetry_3 
 _geom_angle_publ_flag 
N1 Si1 C25 116.97(12) . . ? 
N1 Si1 C27 112.61(12) . . ? 
C25 Si1 C27 109.06(13) . . ? 
N1 Si1 C26 105.40(12) . . ? 
C25 Si1 C26 105.33(13) . . ? 
C27 Si1 C26 106.65(14) . . ? 
C1 N1 Si1 127.50(18) . . ? 
C1 N1 Ga1 119.83(16) . . ? 
Si1 N1 Ga1 111.49(11) . . ? 
N1 C1 C6 123.8(2) . . ? 
N1 C1 C2 119.0(2) . . ? 
C6 C1 C2 117.1(2) . . ? 
C3 C2 C1 121.0(2) . . ? 
C3 C2 C7 118.3(2) . . ? 
C1 C2 C7 120.4(2) . . ? 
C4 C3 C2 121.3(2) . . ? 
C4 C3 H3 119.3 . . ? 
C2 C3 H3 119.3 . . ? 
C5 C4 C3 118.2(2) . . ? 
C5 C4 H4 120.9 . . ? 
C3 C4 H4 120.9 . . ? 
C4 C5 C6 122.3(3) . . ? 
C4 C5 H5 118.8 . . ? 
C6 C5 H5 118.8 . . ? 
C5 C6 C1 119.7(2) . . ? 
C5 C6 C16 116.2(2) . . ? 
C1 C6 C16 123.9(2) . . ? 
C12 C7 C8 119.6(2) . . ? 
C12 C7 C2 121.3(2) . . ? 
C8 C7 C2 119.1(2) . . ? 
C9 C8 C7 119.1(3) . . ? 
C9 C8 C13 118.9(2) . . ? 
C7 C8 C13 122.0(2) . . ? 
C10 C9 C8 122.1(3) . . ? 
C10 C9 H9 119.0 . . ? 
C8 C9 H9 119.0 . . ? 
C9 C10 C11 118.2(3) . . ? 
C9 C10 C14 120.0(3) . . ? 
C11 C10 C14 121.7(3) . . ? 
C10 C11 C12 121.8(3) . . ? 
C10 C11 H11 119.1 . . ? 
C12 C11 H11 119.1 . . ? 
C11 C12 C7 119.2(2) . . ? 
C11 C12 C15 120.1(2) . . ? 
C7 C12 C15 120.7(2) . . ? 
C8 C13 H13A 109.5 . . ? 
C8 C13 H13B 109.5 . . ? 
H13A C13 H13B 109.5 . . ? 
C8 C13 H13C 109.5 . . ? 
H13A C13 H13C 109.5 . . ? 
H13B C13 H13C 109.5 . . ? 
C10 C14 H14A 109.5 . . ? 
C10 C14 H14B 109.5 . . ? 
H14A C14 H14B 109.5 . . ? 
C10 C14 H14C 109.5 . . ? 
H14A C14 H14C 109.5 . . ? 
H14B C14 H14C 109.5 . . ? 
C12 C15 H15A 109.5 . . ? 
C12 C15 H15B 109.5 . . ? 
H15A C15 H15B 109.5 . . ? 
C12 C15 H15C 109.5 . . ? 
H15A C15 H15C 109.5 . . ? 
H15B C15 H15C 109.5 . . ? 
C17 C16 C21 118.8(2) . . ? 
C17 C16 C6 121.4(2) . . ? 
C21 C16 C6 119.3(2) . . ? 
C18 C17 C16 119.4(3) . . ? 
C18 C17 C22 118.2(2) . . ? 
C16 C17 C22 122.3(2) . . ? 
C19 C18 C17 122.3(3) . . ? 
C19 C18 H18 118.9 . . ? 
C17 C18 H18 118.9 . . ? 
C18 C19 C20 117.5(3) . . ? 
C18 C19 C23 121.4(3) . . ? 
C20 C19 C23 121.1(3) . . ? 
C21 C20 C19 122.5(3) . . ? 
C21 C20 H20 118.8 . . ? 
C19 C20 H20 118.8 . . ? 
C20 C21 C16 119.5(3) . . ? 
C20 C21 C24 118.6(2) . . ? 
C16 C21 C24 121.9(2) . . ? 
C17 C22 H22A 109.5 . . ? 
C17 C22 H22B 109.5 . . ? 
H22A C22 H22B 109.5 . . ? 
C17 C22 H22C 109.5 . . ? 
H22A C22 H22C 109.5 . . ? 
H22B C22 H22C 109.5 . . ? 
C19 C23 H23A 109.5 . . ? 
C19 C23 H23B 109.5 . . ? 
H23A C23 H23B 109.5 . . ? 
C19 C23 H23C 109.5 . . ? 
H23A C23 H23C 109.5 . . ? 
H23B C23 H23C 109.5 . . ? 
C21 C24 H24A 109.5 . . ? 
C21 C24 H24B 109.5 . . ? 
H24A C24 H24B 109.5 . . ? 
C21 C24 H24C 109.5 . . ? 
H24A C24 H24C 109.5 . . ? 
H24B C24 H24C 109.5 . . ? 
Si1 C25 H25A 109.5 . . ? 
Si1 C25 H25B 109.5 . . ? 
H25A C25 H25B 109.5 . . ? 
Si1 C25 H25C 109.5 . . ? 
H25A C25 H25C 109.5 . . ? 
H25B C25 H25C 109.5 . . ? 
Si1 C26 H26A 109.5 . . ? 
Si1 C26 H26B 109.5 . . ? 
H26A C26 H26B 109.5 . . ? 
Si1 C26 H26C 109.5 . . ? 
H26A C26 H26C 109.5 . . ? 
H26B C26 H26C 109.5 . . ? 
Si1 C27 H27A 109.5 . . ? 
Si1 C27 H27B 109.5 . . ? 
H27A C27 H27B 109.5 . . ? 
Si1 C27 H27C 109.5 . . ? 
H27A C27 H27C 109.5 . . ? 
H27B C27 H27C 109.5 . . ? 
 
_diffrn_measured_fraction_theta_max    0.973 
_diffrn_reflns_theta_full              25.25 
_diffrn_measured_fraction_theta_full   0.973 
_refine_diff_density_max    0.439 
_refine_diff_density_min   -0.471 
_refine_diff_density_rms    0.080 
